# Supplementary material
Source: publisher site journal article supplement (http://www.spandidos-publications.com/6247/downloadSupplementary)
Supplement: Supplementary file 1 [file downloadSupplementary]

Table SI. Differences in expression of IFN- $\gamma$  in patients with diffuse large B-cell lymphoma with different C-reactive protein levels.

| Targets       | 0 vs. 2 | 0 vs. 3 | 1 vs. 2 | 1 vs. 3 | 2 vs. 3 |
|---------------|---------|---------|---------|---------|---------|
| IFN- $\gamma$ | P=0.765 | P=0.017 | P=1.000 | P=0.404 | P=0.850 |

Group 0, CRP 0-10 mg/l; group 1, CRP 10-50 mg/l; group 2, CRP 50-100 mg/l; and group 3, CRP >100 mg/l. IFN- $\gamma$ , interferon- $\gamma$ .

Table SII. Variability of cytokines among patients with diffuse large B-cell lymphoma with different IPI scores.

| Targets | 2 vs. 3 | 2 vs. 4 | 2 vs. 5 |
|---------|---------|---------|---------|
| IL-6    | P=0.167 | P=0.035 | P=0.766 |
| IL-10   | P=0.017 | P=0.003 | P=0.088 |

The grouping numbers 2, 3, 4 and 5 represent the IPI score. IL, interleukin; IPI, International Prognostic Index.
